# Supplementary material for: Gene Profiling of a 3D Psoriatic Skin Model Enriched in T Cells: Downregulation of PTPRM Promotes Keratinocyte Proliferation through Excessive ERK1/2 Signaling
Source: MDPI journal article supplement (doi:10.3390/cells11182904), 2022-09-16
Supplement: s1 [file s1]

## SUPPLEMENTARY MATERIAL

### Supplementary Figures

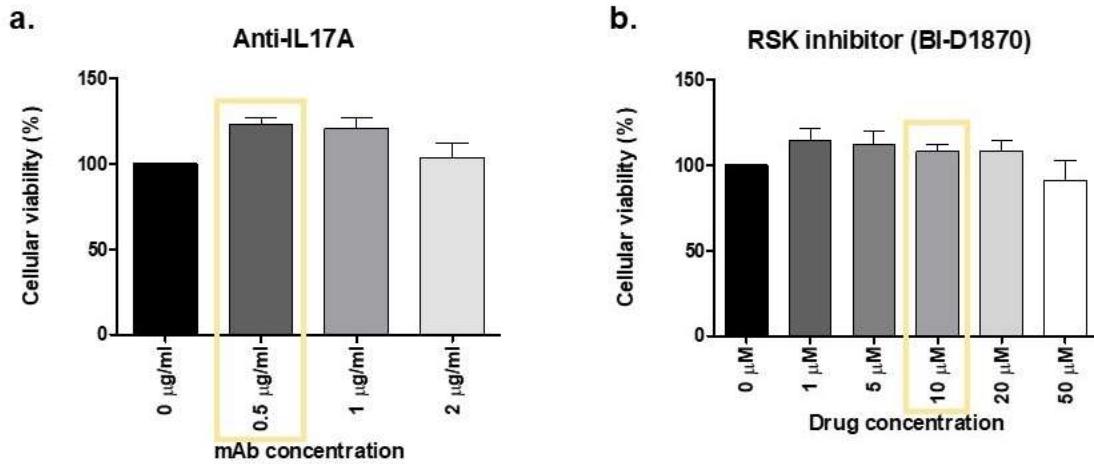

**Supplementary Figure S1.** MTS assay performed on psoriatic keratinocytes grown as monolayer to test three different doses of neutralizing anti-IL17A (0.5, 1 and 2 µg/ml) (a), and five different doses of ribosomal s6 kinase inhibitor (BI-D1870, 1, 5, 10, 20 and 50 µM) (b).

## Supplementary Tables

**Supplementary Table S1.** Complete list of antibodies used for indirect immunofluorescence, EMSA and Western blot analyses.

| Antigens                          | Biological source                    | Company                                 | #Cat        | #Lot         | Dilution         |
|-----------------------------------|--------------------------------------|-----------------------------------------|-------------|--------------|------------------|
| <b>Primary antibodies</b>         |                                      |                                         |             |              |                  |
| <i>Anti-human PTPRM</i>           | Mouse monoclonal                     | Abcam                                   | Ab233815    | GR3241130-4  | 1:1000 overnight |
| <i>NELL2</i>                      | Rabbit monoclonal                    | Abcam                                   | Ab181376    | GR152681-1   | 1:1000           |
| <i>p-ERK1/2</i>                   | Rabbit polyclonal                    | Cell Signaling Technology               | 9101S       | 31           | 1:1000           |
| <i>ERK1/2</i>                     | Rabbit polyclonal                    | Cell Signaling Technology               | 9102S       | 27           | 1:1000           |
| <i>Anti-β actin</i>               | Mouse monoclonal IgG1                | Abcam                                   | A5441       | I22M4782     | 1:30000          |
| <i>p-NF-κB</i>                    | Mouse monoclonal                     | Santa Cruz Biotechnology                | Sc136548    | L3021        | 1:100            |
| <i>NF-κB</i>                      | Mouse monoclonal                     | Santa Cruz Biotechnology                | Sc8008      | D1122        | 1:500            |
| <i>p-Sp1</i>                      | Rabbit polyclonal                    | Abcam                                   | Ab227383    | GR3324683-13 | 1:500            |
| <i>Sp1</i>                        | Rabbit polyclonal                    | Abcam                                   | Ab59257     | GR3404039-4  | 1:500            |
| <i>Anti-human Ki-67</i>           | Mouse monoclonal IgG <sub>1</sub> ,κ | BD biosciences                          | 556003      | 8239549      | 1:400            |
| <b>Secondary antibodies</b>       |                                      |                                         |             |              |                  |
| <i>Anti-mouse Alexa Fluor 488</i> | Goat polyclonal IgG                  | Life                                    | A11001      | 1890503      | 1:1500           |
| <i>Anti-rabbit HRP</i>            | Goat polyclonal IgG (H+L)            | Jackson ImmunoResearch Laboratories Inc | 111-035-003 | I46270       | 1:60000          |
| <i>Anti-mouse HRP</i>             | Goat polyclonal IgG                  | Jackson ImmunoResearch Laboratories Inc | 115-035-003 | I46501       | 1:60000          |

**Supplementary Table S2.** Oligonucleotides used as labeled probes or competitors in the EMSAs.

| Oligonucleotide | Top strand (5'-3')             |
|-----------------|--------------------------------|
|                 | Bottom strand (5'-3')          |
| Sp1             | GATCATATCTGCGGGGCGGGGCAGACACAG |
|                 | GATCCTGTGTCTGCCCCGCCCCGCAGATAT |
| NFKB            | GATCAGTTGAGGGGACTTTCCCAGGC     |
|                 | GATCGCCTGGGAAAGTCCCCTCAACT     |
| NFI             | TTATTTTGGATTGAAGCCAATATGAG     |
|                 | CTCATATTGGCTTCAATCCAAAATAA     |

**Supplementary Table S3.** Comparison between published microarray and RNA-seq datasets with 60 deregulated genes of our study.

| Gene symbol | Gene name                                                        | Gudjonsson et al. [31] | Li et al. [32] | Pasquali et al. [3] | Our study                                 | Our study                                 |
|-------------|------------------------------------------------------------------|------------------------|----------------|---------------------|-------------------------------------------|-------------------------------------------|
|             |                                                                  | L vs H FC              | L vs H FC      | PK vs HK FC         | PS <sup>+</sup> T vs HS <sup>+</sup> T FC | PS <sup>+</sup> T vs HS <sup>+</sup> T FC |
| KRT16       | Keratin, type I cytoskeletal 16                                  | 16.980                 | 6.22           | 7.36                | 1.242                                     | 1.573                                     |
| DEFB4A      | Defensin Beta 4A                                                 | 196.997                | 19913.19       | 32.82               | 0.826                                     | 6.538                                     |
| KYNU        | Kynureninase                                                     | 25.465                 | 23.37          | 20.43               | 1.099                                     | 1.652                                     |
| C10orf99    | Putative uncharacterized protein C10orf99                        | 41.394                 | 47.31          | 13.86               | 2.764                                     | 2.85                                      |
| SERPINA12   | Serpin A12                                                       | 0.242                  | 0.15           | 0.05                | 1.025                                     | 0.877                                     |
| SERPINA3    | Alpha-1-antichymotrypsin; Serpin peptidase inhibitor, member 3   | 2.222                  | 2.27           |                     | 1.217                                     | 2.443                                     |
| SERPINB9    | Serpin B9                                                        | 2.098                  | 2.50           |                     | 1.394                                     | 2.784                                     |
| CXCL11      | C-X-C motif chemokine 11                                         | 2.097                  | 6.10           |                     | 0.273                                     | 2.208                                     |
| CXCL10      | C-X-C motif chemokine 10                                         | 7.053                  | 11.54          | 2.20                | 0.304                                     | 2.880                                     |
| AQP9        | Aquaporin-9                                                      | 0.306                  | 0.13           | 0.15                | 0.314                                     | 0.288                                     |
| IL17RD      | Interleukin 17 receptor D                                        | 0.494                  | 0.46           |                     | 0.692                                     | 0.710                                     |
| IL17D       | Interleukin 17D                                                  | 0.488                  | 0.40           |                     | 0.860                                     | 0.803                                     |
| LCE1B       | Late cornified envelope protein 1B                               | 0.595                  | 0.45           | 0.13                | 0.874                                     | 1.199                                     |
| CXCL9       | C-X-C motif chemokine 9                                          | 6.056                  | 9.35           |                     | 0.179                                     | 8.855                                     |
| MMP1        | Matrix metalloproteinase 1                                       | 3.270                  | 20.19          |                     | 1.902                                     | 6.531                                     |
| AKR1B10     | Aldo-keto reductase family 1 member B10                          | 57.643                 | 78.20          | 22.94               | 2.439                                     | 2.225                                     |
| FLG2        | Filaggrin-2                                                      | 0.349                  | 0.14           | 0.07                | 0.937                                     | 0.463                                     |
| UNC93A      | Protein unc-93 homolog A                                         | 2.710                  | 2.64           |                     | 1.539                                     | 0.791                                     |
| LEPR        | Leptin receptor                                                  | 0.301                  | 0.24           |                     | 1.037                                     | 0.870                                     |
| LTB4R       | Leukotriene B4 receptor                                          | 2.268                  | 2.82           | 2.83                | 1.523                                     | 1.722                                     |
| CCL27       | C-C motif chemokine 27                                           | 0.129                  | 0.08           | 0.24                | 0.330                                     | 0.299                                     |
| HOXA10      | Homeobox A10                                                     | 0.409                  | 0.46           |                     | 0.810                                     | 0.685                                     |
| SPRR2G      | Small proline-rich protein 2G                                    | 8.063                  | 28.47          |                     | 0.597                                     | 0.610                                     |
| SPRR4       | Small proline-rich protein 4                                     | 0.373                  | 0.12           | 0.12                | 0.307                                     | 0.303                                     |
| LDLR        | Low density lipoprotein receptor                                 | 2.393                  | 2.26           | 2.33                | 1.025                                     | 1.441                                     |
| TNS1        | Tensin 1                                                         | 0.488                  | 0.45           |                     | 0.599                                     | 0.600                                     |
| HMGCS2      | Hydroxymethylglutaryl-CoA synthase, mitochondrial                | 0.444                  | 0.14           | 0.38                | 0.870                                     | 0.830                                     |
| POSTN       | Periostin                                                        | 0.385                  | 0.34           | 0.05                | 1.408                                     | 1.814                                     |
| TGFBR3      | Transforming growth factor beta receptor 3                       | 0.439                  | 0.41           | 0.66                | 0.847                                     | 0.754                                     |
| WISP2       | WNT1-inducible-signaling pathway protein 2, WISP2 protein        | 0.463                  | 0.27           |                     | 1.536                                     | 1.386                                     |
| CDH3        | Cadherin 3                                                       | 3.539                  | 3.12           | 2.25                | 1.462                                     | 1.753                                     |
| EDIL3       | EGF-like repeat and discoidin I-like domain-containing protein 3 | 0.465                  | 0.28           | 0.28                | 0.889                                     | 0.823                                     |
| AIM2        | Absent in melanoma 2                                             | 2.269                  | 6.41           |                     | 0.439                                     | 1.495                                     |
| CYP2C18     | Cytochrome P450 2C18                                             | 2.148                  | 1.83           |                     | 0.580                                     | 0.739                                     |
| ARG1        | Arginase-1                                                       | 3.665                  | 5.39           |                     | 1.541                                     | 1.839                                     |
| GJB2        | Gap junction beta-2 protein                                      | 7.311                  | 18.82          | 9.32                | 1.648                                     | 2.384                                     |
| CXCR4       | C-X-C chemokine receptor 4                                       | 3.081                  | 3.32           | 2.17                | 0.610                                     | 1.541                                     |
| CREB5       | CAMP responsive element binding protein 5                        | 0.495                  | 0.49           |                     | 0.750                                     | 0.841                                     |
| CST6        | Cystatin-M                                                       | 0.343                  | 0.16           | 0.46                | 0.716                                     | 0.501                                     |
| HMOX1       | Heme oxygenase 1                                                 | 2.174                  | 2.34           |                     | 0.779                                     | 0.815                                     |
| CD1A        | Cluster of differentiation 1a                                    | 0.509                  | 0.40           |                     | 0.207                                     | 0.363                                     |
| CYP4B1      | Cytochrome P450 family 4 subfamily B member 1                    | 0.426                  | 0.25           |                     | 0.344                                     | 0.294                                     |
| CYP2J2      | Cytochrome P450 family 2 subfamily J member 2                    | 0.501                  | 0.25           | 0.47                | 0.571                                     | 0.665                                     |
| CD36        | Cluster of differentiation 36                                    | 2.091                  | 2.53           | 6.86                | 2.091                                     | 1.866                                     |
| FABP5       | Fatty acid binding protein 5                                     | 2.756                  | 10.45          | 7.52                | 2.055                                     | 1.909                                     |
| PTPRM       | Receptor-type tyrosine-protein phosphatase mu                    |                        | 0.60           | 0.41                | 0.408                                     | 0.327                                     |
| NR2F2       | Nuclear receptor subfamily 2 group f member 2                    |                        | 0.56           |                     | 0.200                                     | 0.259                                     |
| MCHR1       | Melanin concentrating hormone receptor 1                         |                        | 1.67           |                     | 3.053                                     | 2.989                                     |
| CCL3        | C-C motif chemokine 3                                            |                        | 9.21           |                     | 0.835                                     | 1.710                                     |
| ELL2        | Elongation factor for RNA polymerase II                          |                        | 1.72           | 1.53                | 2.142                                     | 2.723                                     |
| IL1R2       | Interleukin 1 receptor type 2                                    |                        | 0.77           |                     | 0.231                                     | 0.502                                     |
| IL1A        | Interleukin 1 alpha                                              |                        | 0.70           |                     | 0.440                                     | 0.592                                     |
| IL12RB2     | Interleukin 12 receptor subunit beta 2                           |                        | 3.66           | 2.15                | 1.369                                     | 1.550                                     |
| IL18        | Interleukin 18                                                   |                        | 0.61           |                     | 0.501                                     | 0.471                                     |
| CAMP        | Cathelicidin antimicrobial peptide                               |                        | 7.70           |                     | 1.902                                     | 2.822                                     |
| FABP6       | Fatty acid binding protein 6                                     |                        | 1.96           |                     | 3.677                                     | 3.229                                     |
| CCR10       | C-C chemokine receptor 10                                        |                        | 0.43           |                     | 0.338                                     | 0.487                                     |
| POU2AF1     | POU class 2 homeobox associating factor 1                        |                        | 1.23           |                     | 4.451                                     | 4.262                                     |
| KRT31       | Keratin 31                                                       |                        | 0.27           | 0.37                | 0.130                                     | 0.253                                     |
| TRPS1       | Transcriptional Repressor GATA binding 1                         |                        | 0.89           | 1.50                | 2.152                                     | 4.122                                     |

Genes whose fold change are indicated in black are similarly deregulated (either repressed or activated) whereas those in red are regulated in opposite ways between our study and those of Gudjonsson et al. [31], Li et al. [32] or Pasquali et al. [3]. L: lesional psoriatic skin; H: healthy skin; PK: psoriatic keratinocyte; HK: healthy keratinocytes. PS: psoriatic skin substitutes; HS: healthy skin substitutes; T: T cells; FC: fold change.
